# Supplementary material for: Epigenetic interaction between UTX and DNMT1 regulates diet-induced myogenic remodeling in brown fat
Source: PubMed Central journal article supplement (PMC8617140; doi:10.1038/s41467-021-27141-7), 2021-11-25
Supplement: 41467_2021_27141_MOESM1_ESM.pdf [file 41467_2021_27141_MOESM1_ESM.pdf]

**Supplemental Tables and Figures**  
**Epigenetic Interaction between UTX and DNMT1 Regulates Diet-Induced Myogenic Remodeling in Brown Fat**

Fenfen Li<sup>1</sup>, Jia Jing<sup>1</sup>, Miranda Movahed<sup>1</sup>, Xin Cui<sup>1</sup>, Qiang Cao<sup>1</sup>, Rui Wu<sup>1</sup>, Ziyue Chen<sup>2</sup>,  
Liqing Yu<sup>3</sup>, Yi Pan<sup>2</sup>, Huidong Shi<sup>4,5</sup>, Hang Shi<sup>1\*</sup>, Bingzhong Xue<sup>1\*</sup>

<sup>1</sup>Department of Biology, Georgia State University, Atlanta, GA 30303, USA.

<sup>2</sup>Department of Computer Science, Georgia State University, Atlanta, GA 30303, USA

<sup>3</sup>Division of Endocrinology, Diabetes and Nutrition, Department of Medicine, University of Maryland School of Medicine, Baltimore, MD 21201, USA.

<sup>4</sup>Georgia Cancer Center, and <sup>5</sup>Department of Biochemistry and Molecular Biology, Medical College of Georgia, Augusta University, Augusta, GA 30912, USA.

**Running title:** UTX and DNMT1 regulate myogenic remodeling in BAT.

\* Correspondence should be addressed to:

Hang Shi, Department of Biology and Center for Obesity Reversal, Georgia State University, Atlanta, GA 30303, USA. Contact: 404-413-5799, [hshi3@gsu.edu](mailto:hshi3@gsu.edu).

Bingzhong Xue, Department of Biology and Center for Obesity Reversal, Georgia State University, Atlanta, GA 30303, USA. Contact: 404-413-5747, [bxue@gsu.edu](mailto:bxue@gsu.edu)

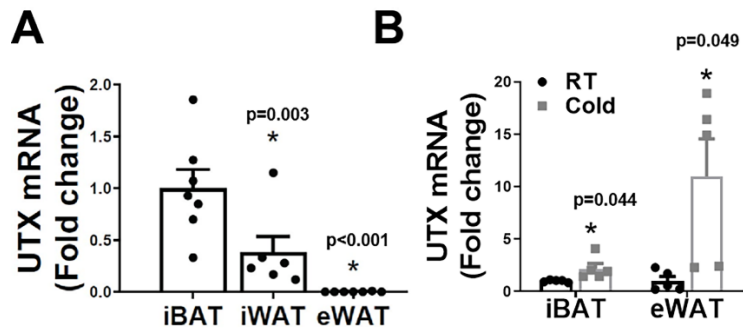

**Supplemental figure 1. (A)** *Utx* mRNA level in interscapular BAT (iBAT), inguinal WAT (iWAT) and epididymal WAT (eWAT) depots of 2-month-old male mice (n=7/group). \*indicates statistical significance vs. iBAT by One-Way ANOVA followed by Fisher's Least Significant Difference (LSD) test,  $F(2,18)=15.17$ ,  $p<0.0001$ .

**(B)** *Utx* mRNA level in iBAT and eWAT depots of 2-month-old male mice housed at room temperature (RT) or challenged with a 7-day 5°C cold exposure (n=5/group). \*indicates statistical significance between room RT and cold exposure by two-tailed unpaired Student's t-test.

All data are expressed as mean  $\pm$  SEM.

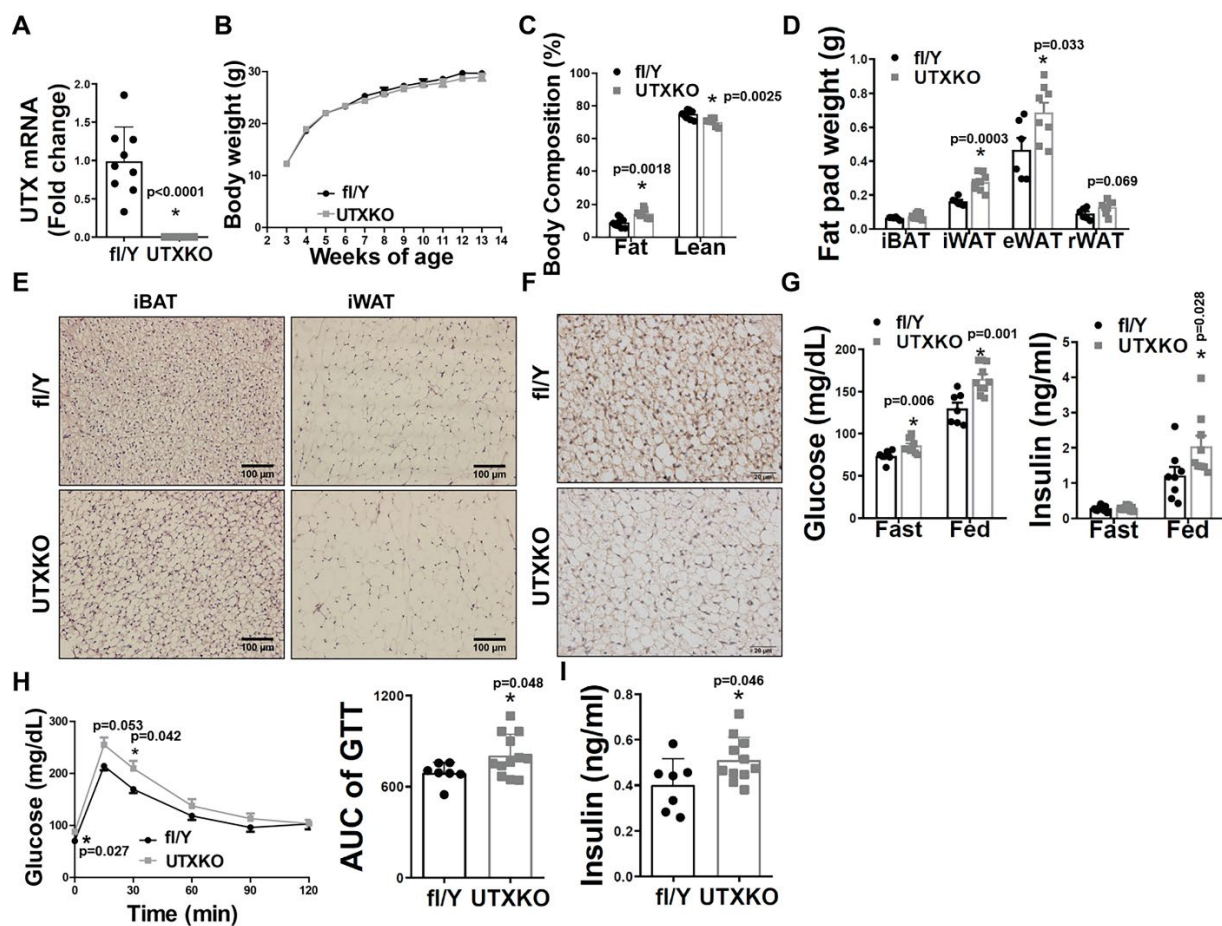

**Supplemental figure 2.** UTX deficiency in brown fat promotes adiposity in male mice on a chow diet. Male UTXKO and their fl/Y littermates were weaned onto regular chow diet.

(A) *Utx* mRNA level in iBAT of male UTXKO and fl/Y mice (n=9/group).

(B) Body weight growth curve of male UTXKO mice and fl/Y mice on regular chow diet (n=7 for fl/Y and 11 for UTXKO).

(C)-(D) Body composition (C, n=9 for fl/Y, and 7 for UTXKO), and Fat pad weight (iBAT, iWAT, eWAT and retroperitoneal WAT (rWAT)) (D, n=6 for fl/Y and 8 for UTXKO) in male UTXKO and fl/Y mice on regular chow diet.

(E)-(F) Representative H&E staining of iBAT and iWAT (E), and UCP1 immunohistochemistry (IHC) staining in iBAT (F) in male UTXKO and fl/Y mice on regular chow diet (n=3 replicates for each group).

(G)-(I) Fed and fasted circulating glucose (n=7 for fl/Y, 10 for UTXKO) and insulin (n=9 for fl/Y, 10 for UTXKO) levels (G), Glucose tolerance test (GTT) (H, n=7 for fl/Y, 12 for UTXKO), and Insulin levels at 15 minutes during GTT test (I, n=7 for fl/Y, 11 for UTXKO) in male UTXKO and fl/Y mice on regular chow diet.

All data are expressed as mean  $\pm$  SEM. \*indicates statistical significance as marked in each panel between UTXKO and fl/Y by two-tailed unpaired Student's t-test.

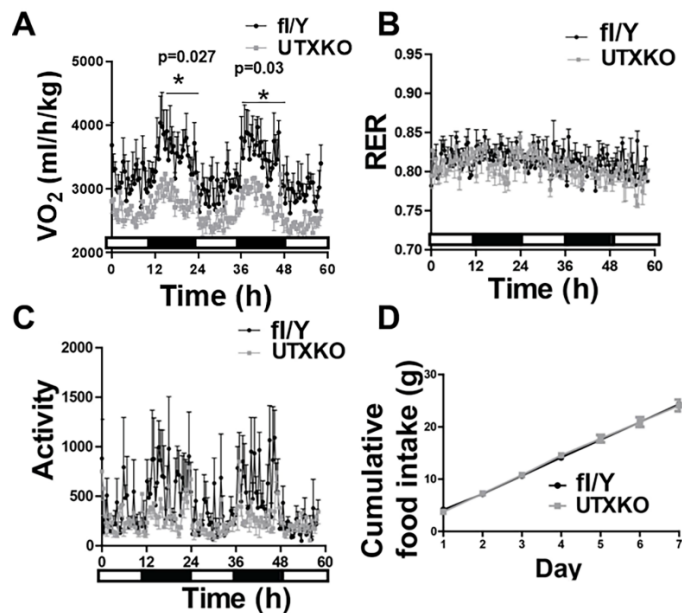

**Supplemental figure 3.** Metabolic characterization of male UTXKO and fl/Y control mice on HFD. Male UTXKO and their littermate control fl/Y mice were put on HFD when they were 5 weeks of age.

(A)-(D) Oxygen consumption ( $VO_2$ ) (A), Respiratory exchange rate (RER) (B), Locomotor activity (C), and Cumulative food intake (D) in male UTXKO and fl/Y mice on HFD. For A-C,  $n=4$ /group; for D,  $n=7$  for fl/Y and 5 for UTXKO. In (A), \*indicates statistical significance between fl/fl and D1KO analyzed by ANOVA with repeated measures. Time 17-24 hours,  $F(1,6)=8.518$ ,  $p=0.027$ ; time 36-48 hours,  $F(1,6)=8.058$ ,  $p=0.03$ .

All data are expressed as mean  $\pm$  SEM.

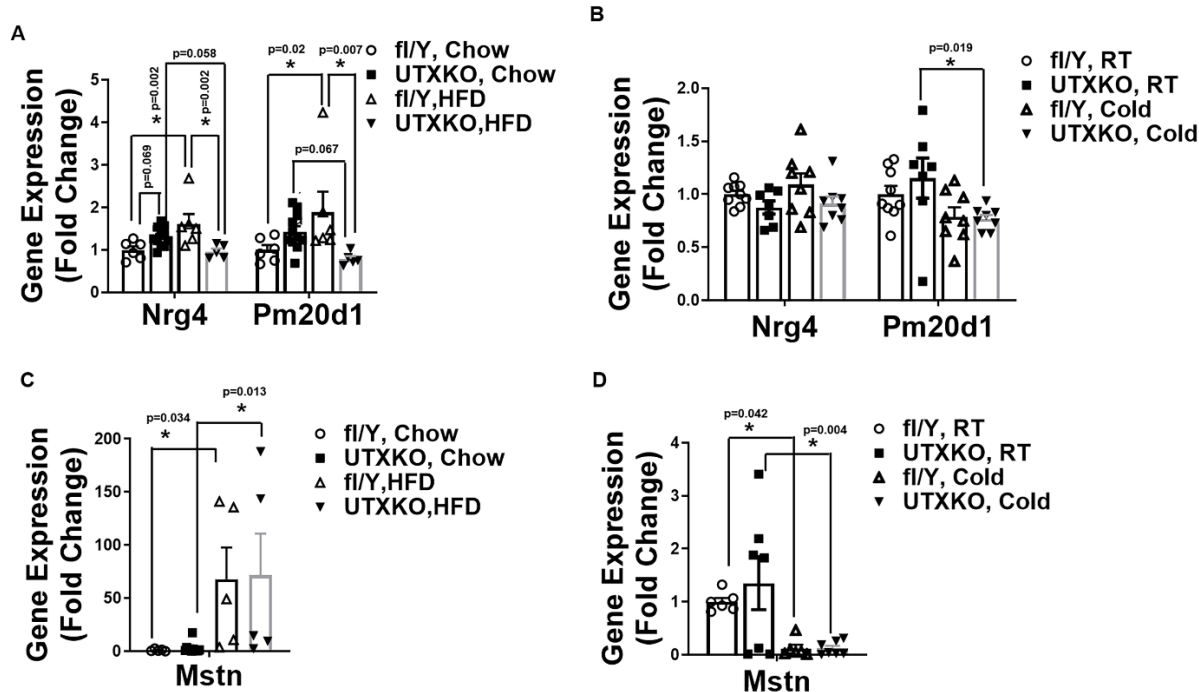

**Supplemental Figure 4.** Gene expression analysis in iBAT of male UTXKO and fl/Y littermate control mice.

(A)-(B) *Nrg4* and *Pm20d1* expression in iBAT of male UTXKO and fl/Y littermate control mice fed chow or HFD (A, fl/Y chow=6, UTXKO chow=11, fl/Y HFD=6, UTXKO HFD=5) or challenged with cold (B, fl/Y RT=9, UTXKO RT=7, fl/Y Cold=8, UTXKO Cold=8). \*indicates statistical significance between groups with one-way ANOVA followed by Fisher's LSD multiple comparisons test:  $F(3,24)=5.413$ ,  $p=0.005$  for *Nrg4* in (A),  $F(3,24)=3.559$ ,  $p=0.029$  for *Pm20d1* in (A);  $F(3,28)=1.820$ ,  $p=0.166$  for *Nrg4* in (B),  $F(3,28)=2.849$ ,  $p=0.055$  for *pm20d1* in (B).

(C)-(D) *Mstn* expression in iBAT of male UTXKO and fl/Y littermate control mice fed chow or HFD (C, fl/Y chow=5, UTXKO chow=11, fl/Y HFD=5, UTXKO HFD=5) or challenged with cold (D, fl/Y RT=6, UTXKO RT=7, fl/Y Cold=6, UTXKO Cold=7). \*indicates statistical significance between groups with Kruskal-Wallis non-parametric ANOVA H test by rank followed by Pairwise Comparisons test between groups,  $H(3)=15.378$ ,  $p=0.002$  in (C), and  $H(3)=9.195$ ,  $p=0.027$  in (D).

All data are expressed as mean  $\pm$  SEM.

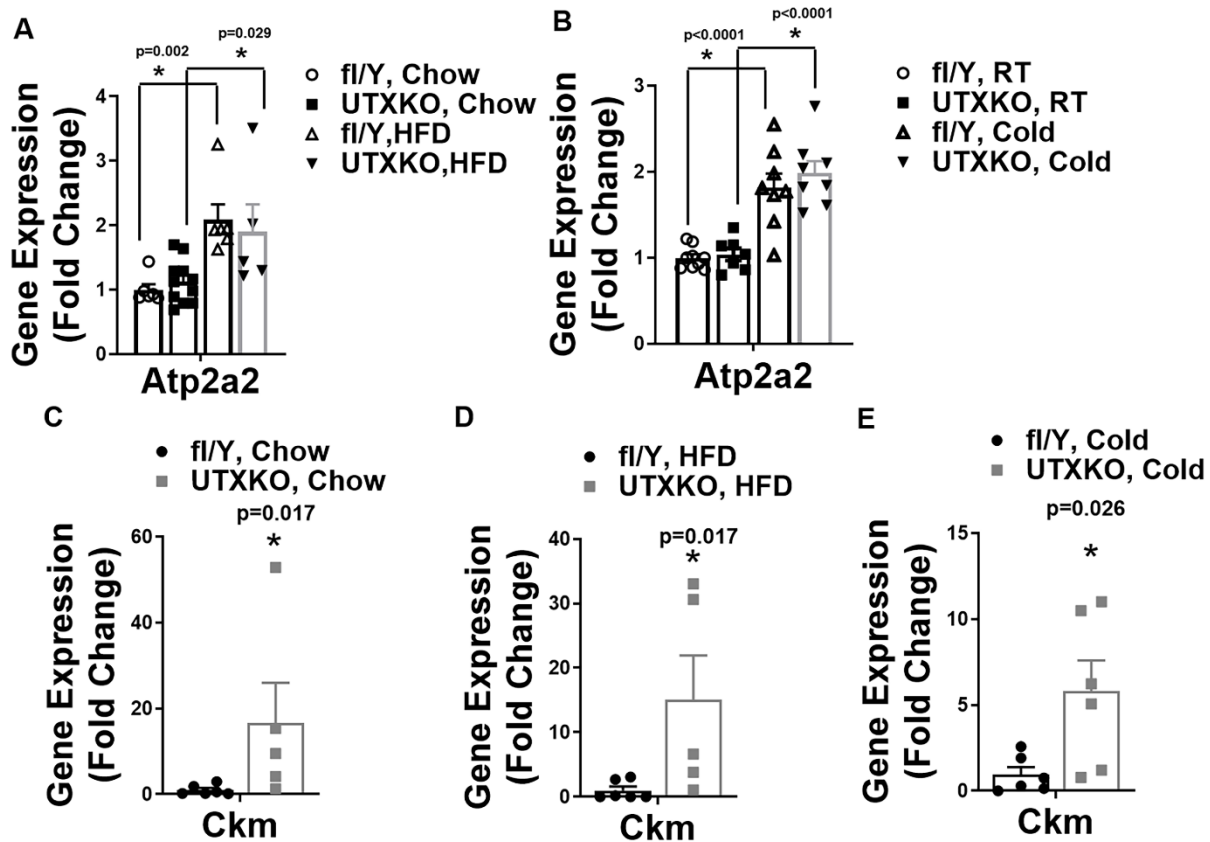

**Supplemental Figure 5.** Gene expression analysis in iBAT of male UTXKO and fl/Y littermate control mice.

(A)-(B) *Atp2a2* expression in iBAT of male UTXKO and fl/Y littermate control mice fed chow or HFD (A, fl/Y chow=6, UTXKO chow=11, fl/Y HFD=6, UTXKO HFD=5) or challenged with cold (B, fl/Y RT=9, UTXKO RT=7, fl/Y Cold=8, UTXKO Cold=8). In (A), \*indicates statistical significance between groups with Kruskal-Wallis non-parametric ANOVA H test by rank followed by Pairwise Comparisons test between groups,  $H(3)=15.165$ ,  $p=0.002$ . In (B), \*indicates statistical significance between groups with one-way ANOVA followed by Fisher's LSD multiple comparisons test,  $F(3,28)=20.205$ ,  $p<0.001$ .

(C)-(E) *Ckm* expression in iBAT of male UTXKO and fl/Y littermate control mice fed chow (C, fl/Y chow=6, UTXKO chow=5), HFD (D, fl/Y HFD=6, UTXKO HFD=5) or challenged with cold (E, n=6/group). \*indicates statistical significance between the two groups by Mann-Whitney's nonparametric U test.

All data are expressed as mean  $\pm$  SEM.

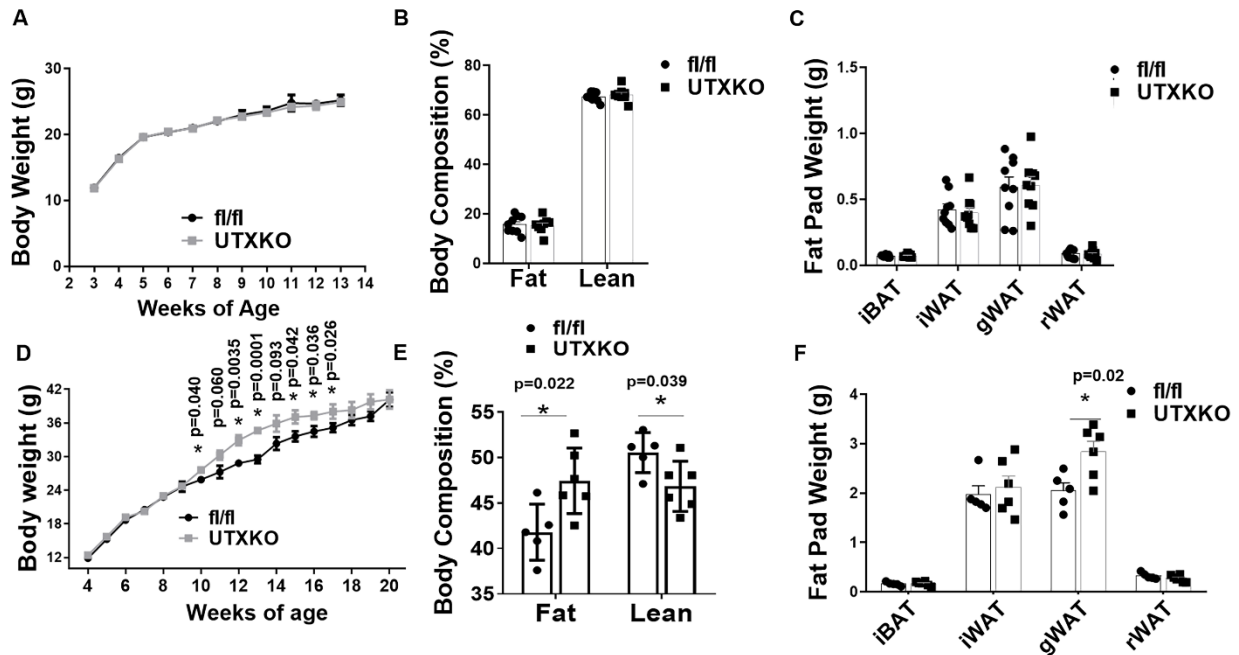

**Supplemental figure 6.** Metabolic phenotypes in female UTXKO and fl/fl littermate control mice fed chow or HFD.

(A)-(C) Body weight (A), body composition (B) and fat pad weight (C) in female UTXKO and fl/fl mice fed chow diet (n=9/group).

(D)-(F) Body weight (D, n=6/group), body composition (E, n=5 for fl/fl, and 6 for UTXKO) and fat pad weight (F, n=5 for fl/fl, and 6 for UTXKO) in female UTXKO and fl/fl mice fed HFD.

All data are expressed as mean  $\pm$  SEM. \*indicates statistical significance between fl/fl and UTXKO by two-tailed unpaired Student's t-test.

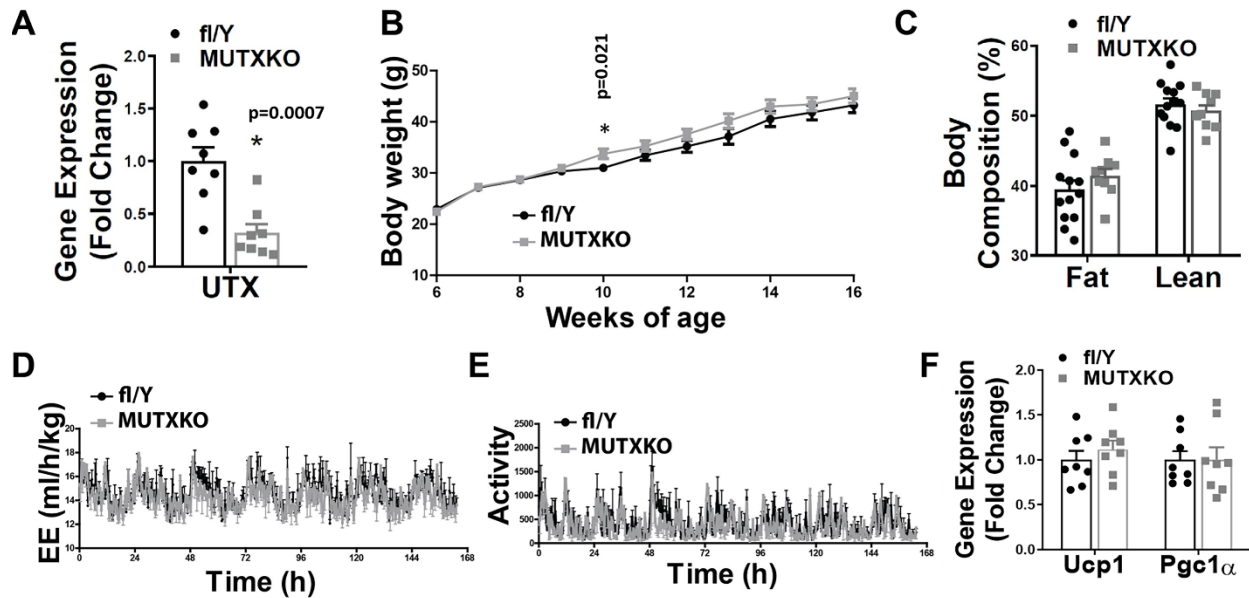

**Supplemental figure 7.** Mice with *Utx* deficiency in *Myf5*-expressing precursor cells (MUTXKO) have normal energy homeostasis and brown fat thermogenic gene expression when fed HFD diet. Male MUTXKO and fl/Y littermate control mice were put on HFD when they were 6 weeks of age. **(A)** *Utx* mRNA level in iBAT of male MUTXKO and fl/Y mice (n=8/group). **(B)-(C)** Body weight growth curve **(B)**, n=12 for fl/Y, and 9 for MUTXKO), and Body composition **(C)**, n=13 for fl/Y, and 9 for MUTXKO) of male MUTXKO mice and fl/Y mice on HFD diet. **(D)-(E)** Energy expenditure (EE)**(D)**, and Locomotor activity **(E)** in male MUTXKO and fl/Y mice on HFD (n=4/group). **(F)** *Ucp1* and *Pgc1 $\alpha$*  expression in iBAT of male MUTXKO and fl/Y mice on HFD (n=8/group). All data are expressed as mean  $\pm$  SEM. \*indicates statistical significance between fl/Y and MUTXKO by two-tailed unpaired Student's t-test.



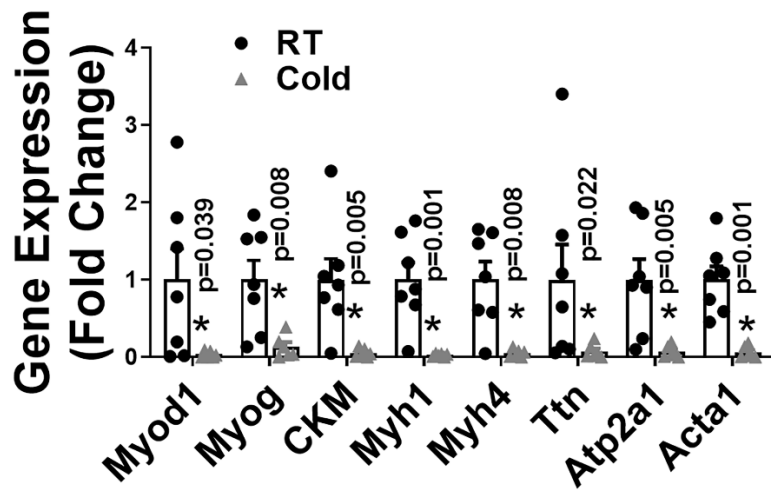

**Supplemental Figure 8.** Myogenic marker gene expression is down-regulated in iBAT from wild type C57BL/6J mice after a 7-day 5°C cold challenge (n=7 for RT and 6 for Cold). All data are expressed as mean ± SEM. \*indicates statistical significance by Mann-Whitney's nonparametric U test.

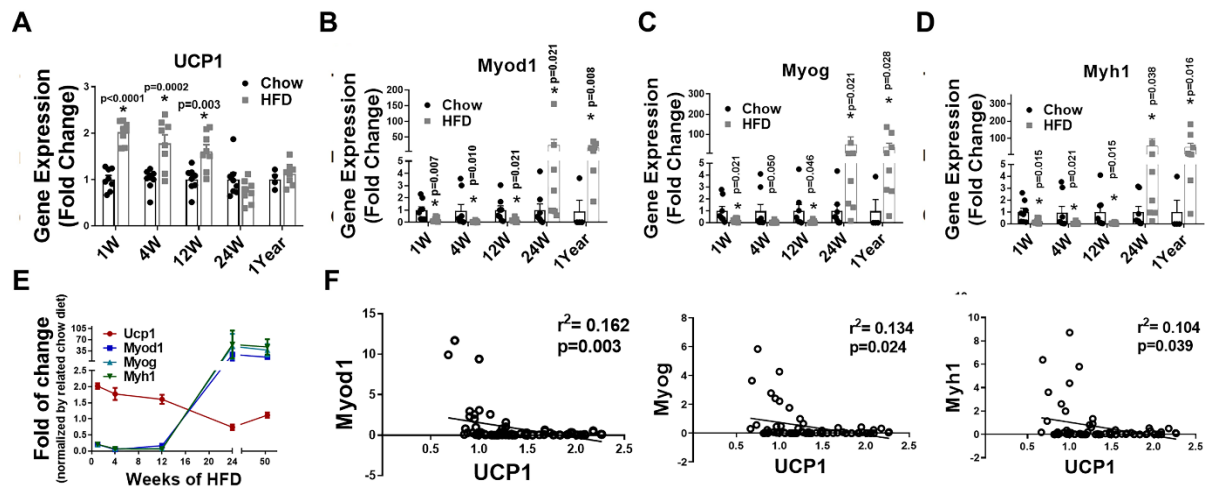

**Supplemental figure 9.** The expression of *Ucp1* and myogenic marker genes are negatively correlated in iBAT. Male C57BL/6J mice were put on either chow or HFD diet when they were 6 weeks old.

(A)-(D) Quantitative RT-PCR analysis of *Ucp1* (A), *Myod1* (B), *Myog* (C), and *Myh1* (D) expression in iBAT of mice fed chow or HFD for 1 week, 4 weeks, 12 weeks, 24 weeks and 1 year (n=4 for 1 year chow group, and n=8/group for all other groups). \*indicates statistical significance analyzed by two-tailed unpaired Student's t-test in (A) and Mann-Whitney's nonparametric U test in (B), (C) and (D).

(E) Quantitative RT-PCR analysis of *Ucp1* and myogenic marker gene expression patterns in iBAT of HFD-fed mice for 1 week, 4 weeks, 12 weeks, 24 weeks and 1 year (n=8/group).

(F) Negative correlations between *Ucp1* and myogenic marker gene expression in iBAT of mice fed chow or HFD for 1 week, 4 weeks, 12 weeks, 24 weeks and 1 year (n=66 for the correlation between *Ucp1* and *Myod1*, n=71 for the correlation between *Ucp1* and *Myog*, and between *Ucp1* and *Myh1*). Correlation between *Ucp1* and myogenic gene expression was analyzed by Spearman's rank correlation coefficient test,  $p=0.003$  between *Ucp1* and *Myod1* gene expression,  $p=0.024$  between *Ucp1* and *Myog* gene expression, and  $p=0.039$  between *Ucp1* and *Myh1* gene expression.

All data are expressed as mean  $\pm$  SEM.

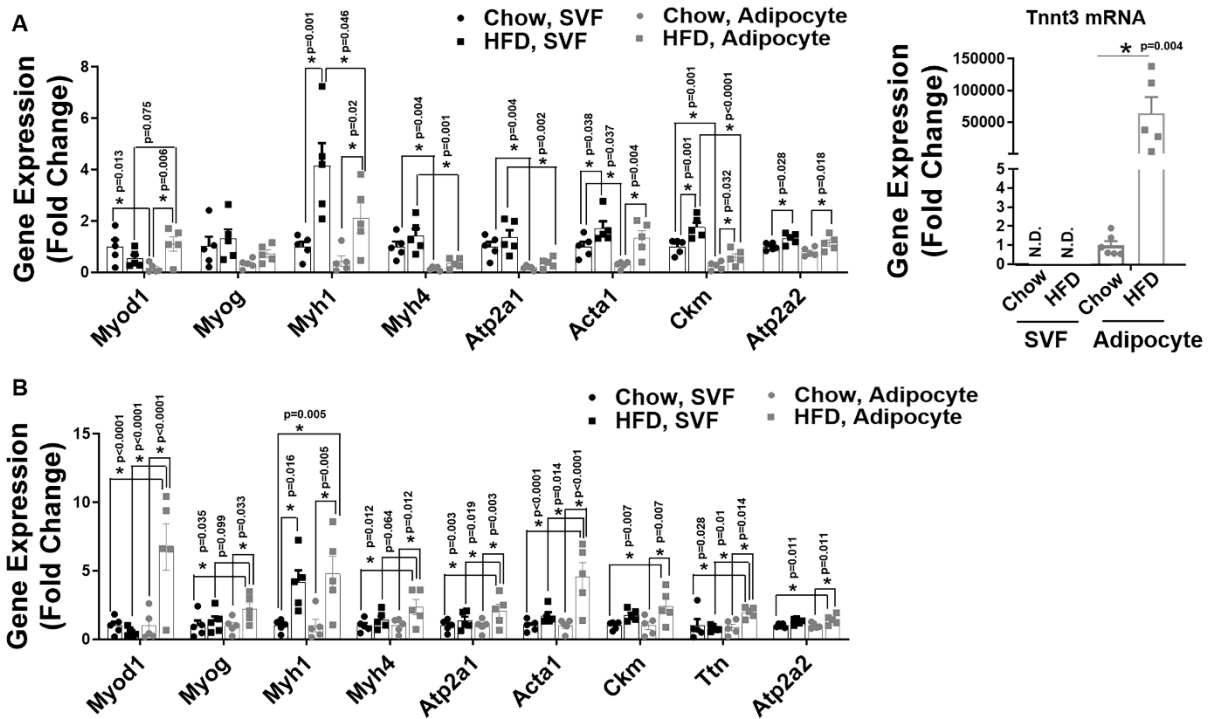

**Supplemental Figure 10.** Myogenic gene expression in SVF and adipocytes isolated from C57BL/6J mice fed chow or HFD for 24 weeks.

**(A)** Myogenic gene expression in SVF and adipocytes isolated from C57BL/6J mice fed chow or HFD for 24 weeks.  $n=5/\text{group}$ . For *Tnn3*,  $n=6$  for Chow adipocytes and  $n=5$  for HFD adipocytes. Gene expression was normalized to the level of Chow SVF. N.D.=not detected. Left panel: \*indicates statistical significance analyzed by one-way ANOVA followed by Fisher's LSD multiple comparisons test. *Myod1*,  $F(3,16)=4.192$ ,  $p=0.023$ ; *Myog*,  $F(3,16)=2.132$ ,  $p=0.14$ ; *Myh1*,  $F(3,16)=8.806$ ,  $p=0.001$ ; *Myh4*,  $F(3,16)=10.50$ ,  $p<0.0001$ ; *Atp2a1*,  $F(3,16)=9.490$ ,  $p<0.0001$ ; *Acta1*,  $F(3,16)=7.385$ ,  $p=0.003$ ; *Ckm*,  $F(3,16)=24.446$ ,  $p<0.0001$ ; *Atp2a2*,  $F(3,16)=5.682$ ,  $p=0.008$ . Right panel: \*indicates statistical significance analyzed by Mann-Whitney's nonparametric U test.

**(B)** Myogenic gene expression in SVF and adipocytes isolated from C57BL/6J mice fed chow or HFD for 24 weeks.  $n=5/\text{group}$ . Gene expression was normalized to the level of either Chow SVF or chow HFD in each of the SVF or adipocyte group. \*indicates statistical significance analyzed by one-way ANOVA followed by Fisher's LSD multiple comparisons test. *Myod1*,  $F(3,16)=10.943$ ,  $p<0.0001$ ; *Myog*,  $F(3,16)=2.413$ ,  $p=0.11$ ; *Myh1*,  $F(3,16)=6.025$ ,  $p=0.006$ ; *Myh4*,  $F(3,16)=3.612$ ,  $p=0.036$ ; *Atp2a1*,  $F(3,16)=5.682$ ,  $p=0.008$ ; *Acta1*,  $F(3,16)=8.971$ ,  $p=0.001$ ; *Ckm*,  $F(3,16)=4.447$ ,  $p=0.019$ ; *Ttn*,  $F(3,16)=3.699$ ,  $p=0.034$ ; *Atp2a2*,  $F(3,16)=4.258$ ,  $p=0.022$ .

All data are expressed as mean  $\pm$  SEM.

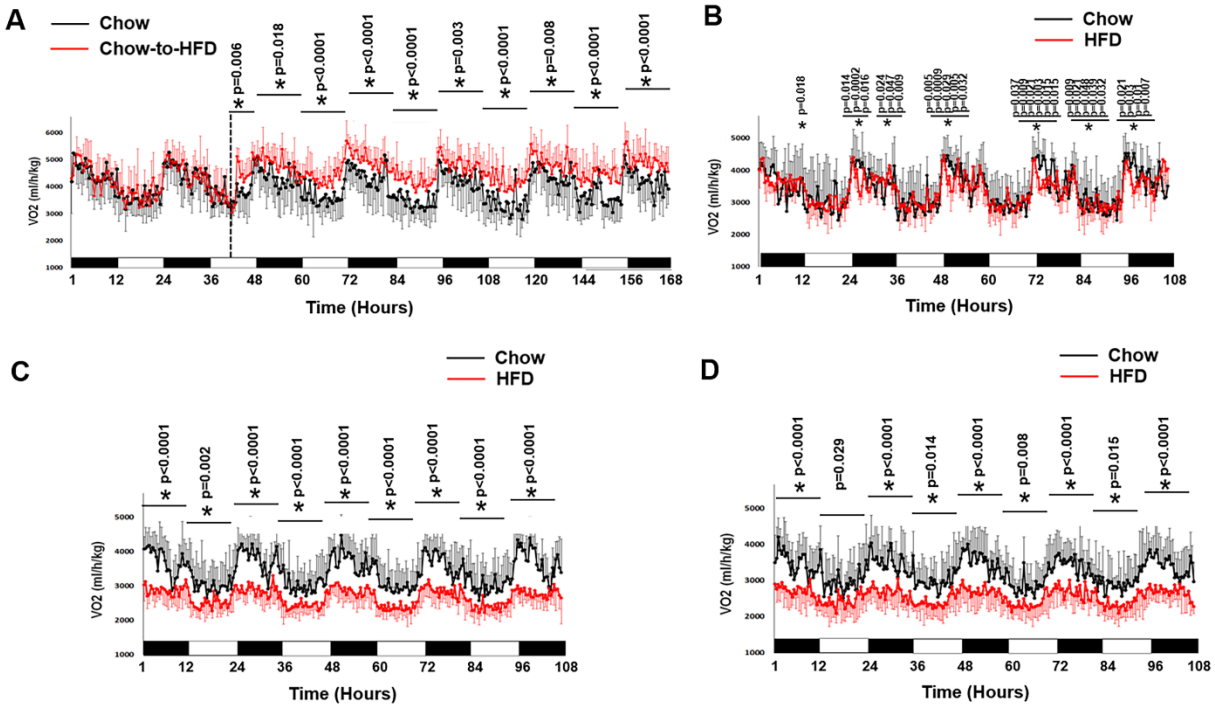

**Supplemental figure 11.** Oxygen consumption in wild type C57BL/6J mice fed a regular chow or HFD. Male C57BL/6J mice were put on either chow or HFD diet when they were 6 weeks old.

**(A)** Oxygen consumption in 6-week-old wild type C57BL/6J mice on chow diet or in 6-week-old C57BL/6J mice switching from chow to HFD. The dotted line indicates the time point when diet was switched from chow to HFD (n=8/group). \*indicates statistical significance between the two groups by ANOVA with repeated measures. Time (41.85-48h),  $F(1,12)=11.085$ ,  $p=0.006$ ; Time (48-60h),  $F(1,12)=7.541$ ,  $p=0.018$ ; Time (60-72h),  $F(1,12)=58.218$ ,  $p<0.0001$ ; Time (72-84h),  $F(1,12)=26.367$ ,  $p<0.0001$ ; Time (84-96h),  $F(1,12)=44.103$ ,  $p<0.0001$ ; Time (96-108h),  $F(1,12)=13.285$ ,  $p=0.003$ ; Time (108-120h),  $F(1,12)=35.549$ ,  $p<0.0001$ ; Time (120-132h),  $F(1,12)=9.946$ ,  $p=0.008$ ; Time (132-144h),  $F(1,12)=100.366$ ,  $p<0.0001$ ; Time (144-156h),  $F(1,12)=31.757$ ,  $p<0.0001$ .

**(B)-(D)** Oxygen consumption in wild type C57BL/6J mice fed a regular chow or HFD for 4 weeks **(B)**, 12 weeks **(C)** and 24 weeks **(D)** (n=8/group).

In **(C)** and **(D)**, \*indicates statistical significance between the two groups by ANOVA with repeated measures. In **(C)**, Time (0-12h),  $F(1,12)=77.416$ ,  $p<0.0001$ ; Time (12-24h),  $F(1,12)=14.885$ ,  $p=0.002$ ; Time (24-36h),  $F(1,12)=115.218$ ,  $p<0.0001$ ; Time (36-48h),  $F(1,12)=23.504$ ,  $p<0.0001$ ; Time (48-60h),  $F(1,12)=68.6$ ,  $p<0.0001$ ; Time (60-72h),  $F(1,12)=40.186$ ,  $p<0.0001$ ; Time (72-84h),  $F(1,12)=79.507$ ,  $p<0.0001$ ; Time (84-96h),  $F(1,12)=21.537$ ,  $p<0.0001$ ; Time (96-108h),  $F(1,12)=79.3$ ,  $p<0.0001$ .

In **(D)**, Time (0-12h),  $F(1,12)=48.97$ ,  $p<0.0001$ ; Time (12-24h),  $F(1,12)=6.108$ ,  $p=0.029$ ; Time (24-36h),  $F(1,12)=30.184$ ,  $p<0.0001$ ; Time (36-48h),  $F(1,12)=8.239$ ,  $p=0.014$ ; Time (48-60h),  $F(1,12)=27.085$ ,  $p<0.0001$ ; Time (60-72h),  $F(1,12)=10.102$ ,  $p=0.008$ ; Time (72-84h),  $F(1,12)=33.658$ ,  $p<0.0001$ ; Time (84-96h),  $F(1,12)=7.994$ ,  $p=0.015$ ; Time (96-108h),  $F(1,12)=23.014$ ,  $p<0.0001$ .

For (**B**), there was no statistical significance between the two groups when analyzed by ANOVA with repeated measures at every 12 hours interval. \*indicates statistical significance at individual time points analyzed by two-tailed unpaired Student's t-test.

All data are expressed as mean  $\pm$  SEM.

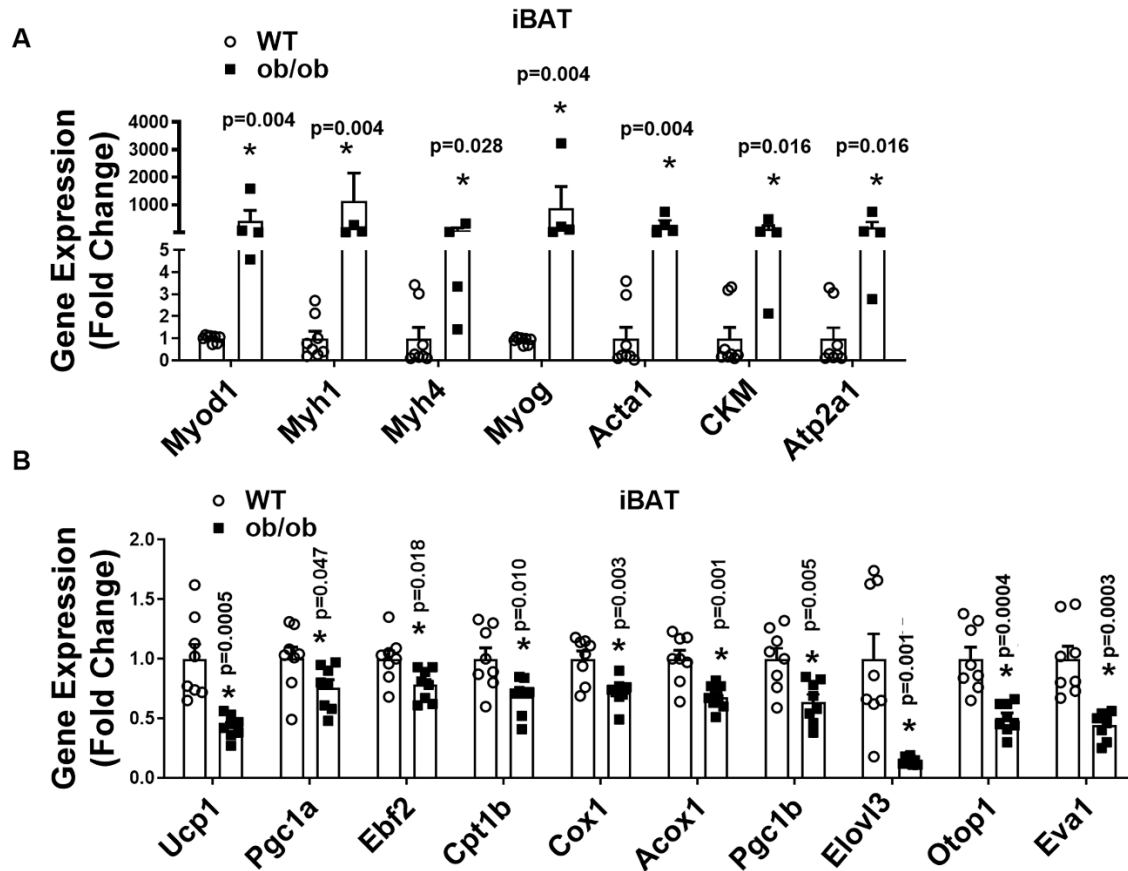

**Supplemental figure 12.** Myogenic (**A**) or BAT (**B**) specific gene expression in 3-month-old *ob/ob* and their WT littermate control mice. In (**A**),  $n=8$  for WT and  $n=4$  for *ob/ob*. \*indicates statistical significance between the two groups analyzed by Mann-Whitney's nonparametric U test. In (**B**),  $n=8$ /group, \*indicates statistical significance between the two groups analyzed by two-tailed unpaired Student's t-test. All data are expressed as mean  $\pm$  SEM.

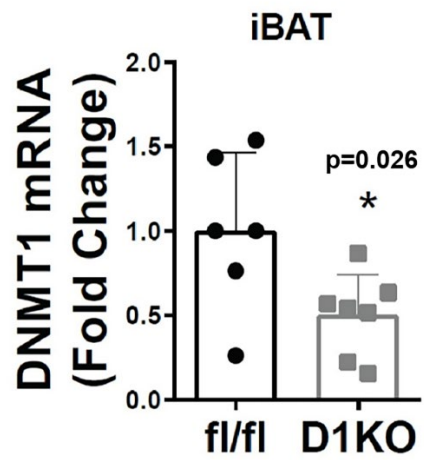

**Supplemental Figure 13.** Dnmt1 expression in iBAT of D1KO and fl/fl littermate control mice (n=6 for fl/fl and 7 for D1KO).

All data are expressed as mean  $\pm$  SEM. \*indicates statistical significance by two-tailed unpaired Student's t-test.

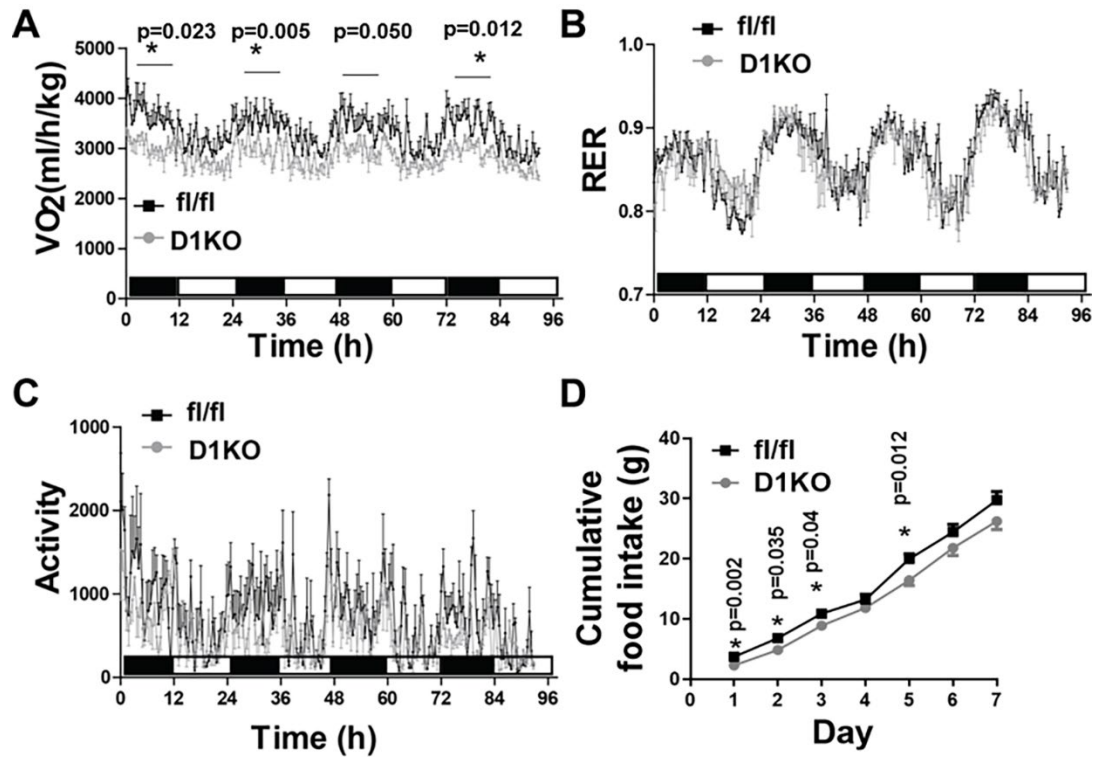

**Supplemental figure 14.** Metabolic characterization of female D1KO and fl/fl mice on chow diet. (A)-(D) Oxygen consumption (A), RER (B), Locomotor activity (C), and Cumulative food intake (D) in female D1KO mice on chow diet. For A-C,  $n=4$ /group; for D,  $n=6$  for fl/fl and 8 for D1KO. In (A), \*indicates statistical significance between the two groups analyzed by ANOVA with repeated measures, time 0-12 hours,  $F(1,6)=9.163$ ,  $p=0.023$ ; time 24-36 hours,  $F(1,6)=19.341$ ,  $p=0.005$ ; time 48-60 hours,  $F(1,6)=5.976$ ,  $p=0.050$ ; time 72-84 hours,  $F(1,6)=12.619$ ,  $p=0.012$ . In (D), \*indicates statistical significance between the two groups analyzed by two-tailed unpaired Student's t-test.

All data are expressed as mean  $\pm$  SEM.



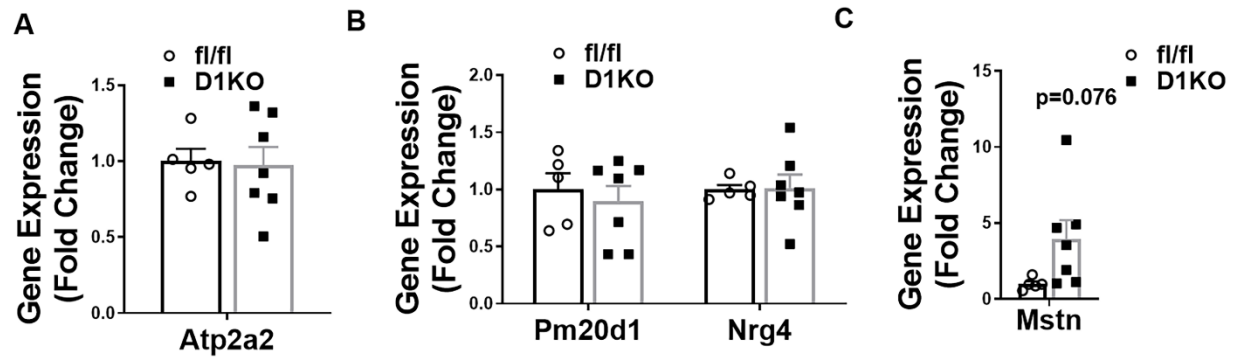

**Supplemental figure 15.** Gene expression analysis of *Atp2a2* (A), *Pm20d1* and *Nrg4* (B), and *Mstn* (C) in iBAT of chow-fed female D1KO and fl/fl littermate control mice. n=5 for fl/fl, 7 for D1KO. All data are expressed as mean  $\pm$  SEM. Statistical analysis was performed by two-tailed unpaired Student's t-test.

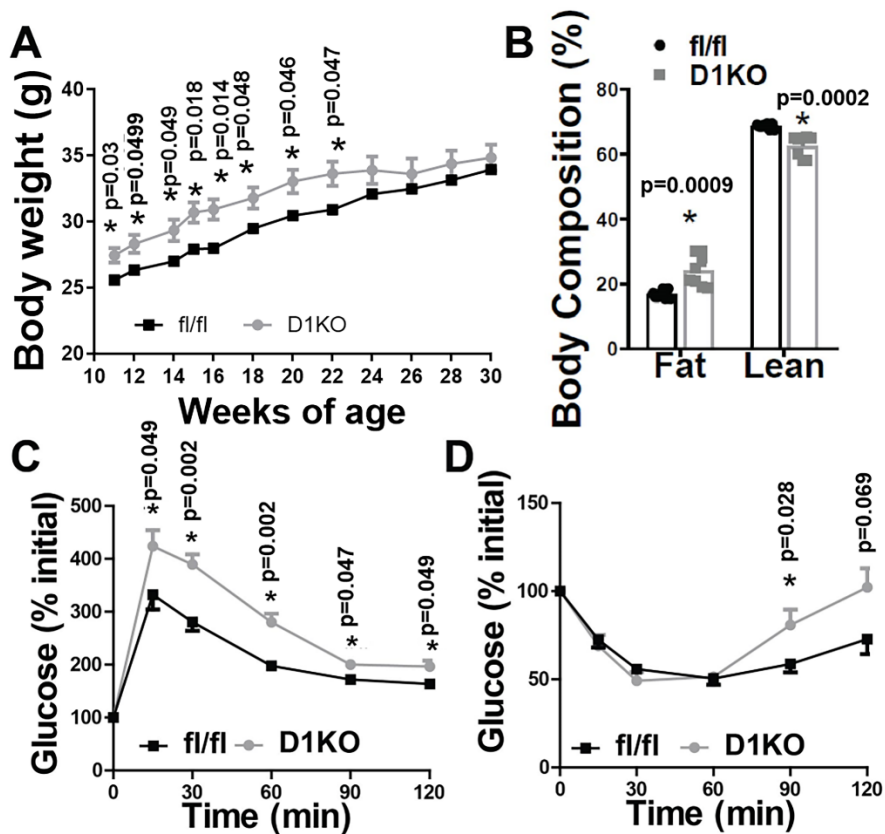

**Supplemental figure 16.** Metabolic characterization of male D1KO and their control fl/fl mice on chow diet.

(A)-(D) Body weight growth curve (A, n=5 for fl/fl and 8 for D1KO), Body composition (B, n=8/group), GTT (C, n=5 for fl/fl and 8 for D1KO), and ITT (D, n=5 for fl/fl and 8 for D1KO) in male D1KO and their control fl/fl mice on chow diet.

All data are expressed as mean  $\pm$  SEM. \*indicates statistical significance between fl/fl and D1KO by two-tailed unpaired Student's t-test.

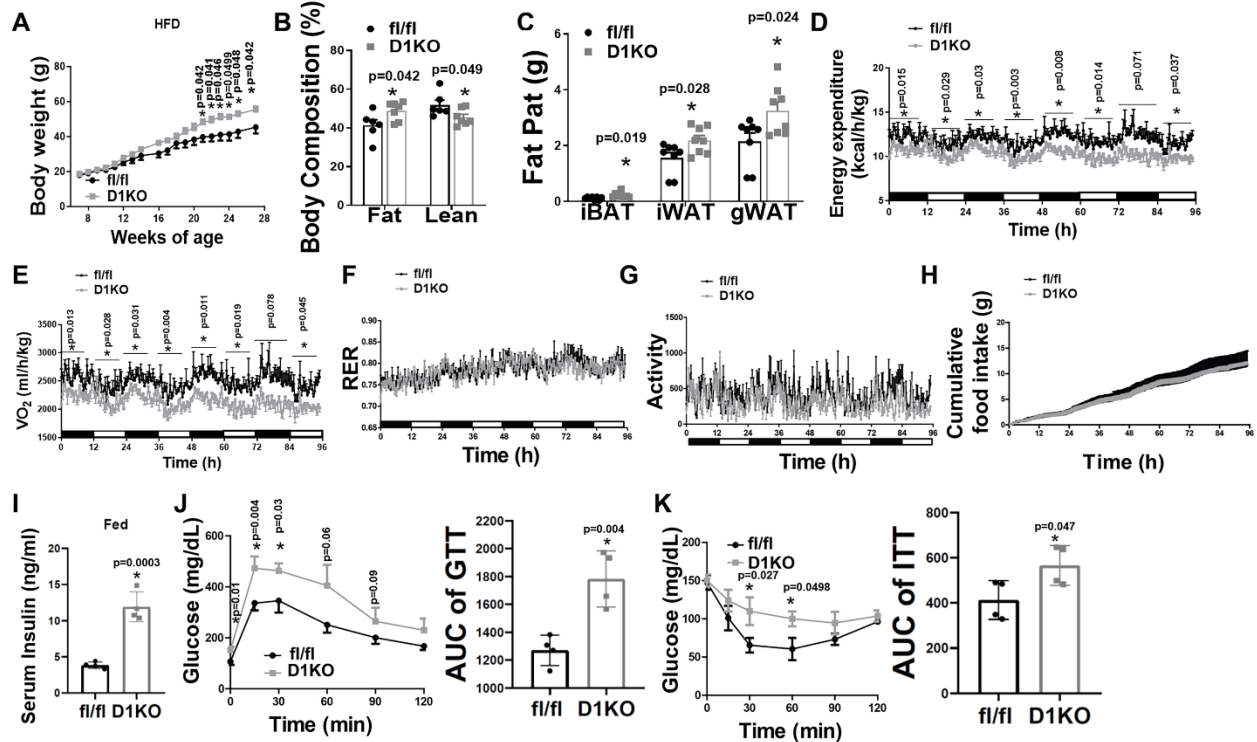

**Supplemental figure 17.** Female D1KO mice are susceptible to DIO. Female D1KO and fl/fl were put on HFD diet when they were 6 weeks old.

(A)-(C) Body weight growth (A, n=4/group), Body composition (B, n=6/group), and Fat pad weight (C, n=8/group) of female D1KO mice and their littermate fl/fl controls fed HFD. \*indicates statistical significance between the two groups by unpaired two-tailed Student's t-test.

(D)-(H) Energy expenditure (D), Oxygen consumption (E), RER (F), Locomotor activity (G), and Cumulative food intake (H) of female D1KO mice and their littermate fl/fl controls on HFD (n=4/group). For left panel in (D) and (E), \*indicates statistical significance between the two groups by One-Way ANOVA with repeated measures. In (D), time 0-12 hours,  $F(1,6)=11.528$ ,  $p=0.015$ ; time 12-24 hours,  $F(1,6)=8.212$ ,  $p=0.029$ ; time 24-36 hours,  $F(1,6)=8.023$ ,  $p=0.03$ ; time 36-48 hours,  $F(1,6)=24.505$ ,  $p=0.003$ ; time 48-60 hours,  $F(1,6)=15.466$ ,  $p=0.008$ ; time 60-72 hours,  $F(1,6)=11.626$ ,  $p=0.014$ ; time 72-84 hours,  $F(1,6)=4.803$ ,  $p=0.071$ , time 84-96 hours,  $F(1,6)=7.092$ ,  $p=0.037$ . In (E), time 0-12 hours,  $F(1,6)=11.971$ ,  $p=0.013$ ; time 12-24 hours,  $F(1,6)=8.235$ ,  $p=0.028$ ; time 24-36 hours,  $F(1,6)=7.909$ ,  $p=0.031$ ; time 36-48 hours,  $F(1,6)=20.564$ ,  $p=0.004$ ; time 48-60 hours,  $F(1,6)=13.091$ ,  $p=0.011$ ; time 60-72 hours,  $F(1,6)=10.221$ ,  $p=0.019$ ; time 72-84 hours,  $F(1,6)=4.509$ ,  $p=0.078$ ; time 84-96 hours,  $F(1,6)=6.344$ ,  $p=0.045$ . For right panel in (D) and (E), \*indicates statistical significance between the two groups by unpaired two-tailed Student's t-test.

(I)-(K) Fed insulin levels (I), GTT (J), and ITT (K) of female D1KO mice and their littermate fl/fl controls on HFD (n=4/group). \*indicates statistical significance between the two groups by unpaired two-tailed Student's t-test.

All data are expressed as mean  $\pm$  SEM.

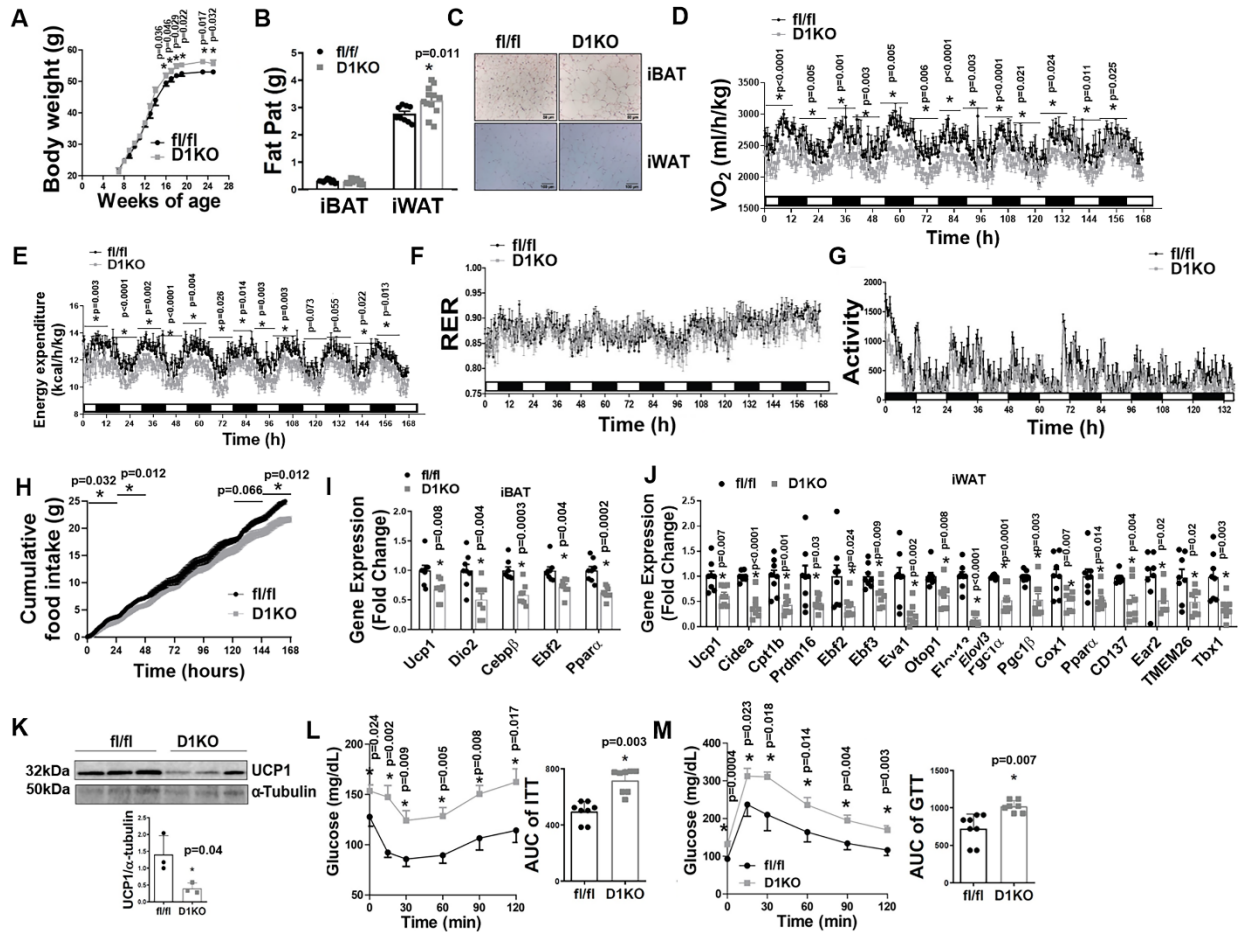

**Supplemental figure 18.** Metabolic characterization of male D1KO and their control fl/fl mice on HFD. Male D1KO and fl/fl mice were put on HFD diet when they were 6 weeks of age.

(A)-(B) Body weight growth curve (A, n=6 for fl/fl and 5 for D1KO) and Fat pad weight (B, n=9 for fl/fl and 12 for D1KO) in male D1KO and fl/fl mice on HFD. \*indicates statistical significance between the two groups by unpaired two-tailed Student's t-test.

(C) Representative H&E staining of iBAT and iWAT in male D1KO and fl/fl mice on HFD (n=3 replicates per group).

(D)-(H) Oxygen consumption (D, n=4/group), Energy expenditure (E, n=8/group), RER (F, n=4/group), Locomotor activity (G, n=4/group), and Cumulative food intake (H, n=4/group) in male D1KO and fl/fl mice on HFD. \*indicates statistical significance between the two groups by One-Way ANOVA with repeated measures.

In (D), time 0-12 hours,  $F(1,6)=37.841$ ,  $p<0.0001$ ; time 12-24 hours,  $F(1,6)=18.319$ ,  $p=0.005$ ; time 24-36 hours,  $F(1,6)=30.925$ ,  $p=0.001$ ; time 36-48 hours,  $F(1,6)=24.505$ ,  $p=0.003$ ; time 48-60 hours,  $F(1,6)=18.941$ ,  $p=0.005$ ; time 60-72 hours,  $F(1,6)=16.78$ ,  $p=0.006$ ; time 72-84 hours,  $F(1,6)=41.852$ ,  $p<0.0001$ ; time 84-96 hours,  $F(1,6)=22.729$ ,  $p=0.003$ ; time 96-108 hours,  $F(1,6)=44.918$ ,  $p<0.0001$ ; time 108-120 hours,  $F(1,6)=9.602$ ,  $p=0.021$ ; time 120-132 hours,  $F(1,6)=9.033$ ,  $p=0.024$ ; time 132-144 hours,  $F(1,6)=13.070$ ,  $p=0.011$ ; time 144-156 hours,  $F(1,6)=8.865$ ,  $p=0.025$ .

In **(E)**, time 0-12 hours,  $F(1,14)=12.51$ ,  $p=0.003$ ; time 12-24 hours,  $F(1,14)=19.578$ ,  $p<0.0001$ ; time 24-36 hours,  $F(1,14)=13.916$ ,  $p=0.002$ ; time 36-48 hours,  $F(1,14)=25.796$ ,  $p<0.0001$ ; time 48-60 hours,  $F(1,14)=11.584$ ,  $p=0.004$ ; time 60-72 hours,  $F(1,14)=6.167$ ,  $p=0.026$ ; time 72-84 hours,  $F(1,14)=7.817$ ,  $p=0.014$ ; time 84-96 hours,  $F(1,14)=13.148$ ,  $p=0.003$ ; . time 96-108 hours,  $F(1,14)=12.291$ ,  $p=0.003$ ; time 108-120 hours,  $F(1,14)=3.771$ ,  $p=0.073$ ; time 120-132 hours,  $F(1,14)=4.383$ ,  $p=0.055$ ; time 132-144 hours,  $F(1,14)=6.143$ ,  $p=0.022$ ; time 144-156 hours,  $F(1,14)=7.986$ ,  $p=0.013$ .

In **(H)**, Time (0-24h),  $F(1,6)=7.718$ ,  $p=0.032$ ; Time (24-48h),  $F(1,6)=12.882$ ,  $p=0.012$ ; Time (48-72h),  $F(1,6)=3.777$ ,  $p=0.1$ ; Time (72-96h),  $F(1,6)=2.277$ ,  $p=0.182$ ; Time (96-120h),  $F(1,6)=3.193$ ,  $p=0.124$ ; Time (120-144h),  $F(1,6)=5.011$ ,  $p=0.066$ ; Time (144-168h),  $F(1,6)=12.757$ ,  $p=0.012$ .

**(I)-(J)** Quantitative PCR analysis of thermogenic gene expression in iBAT **(I)** and iWAT **(J)** of male D1KO and fl/fl mice on HFD ( $n=8$ /group). \*indicates statistical significance between the two groups by unpaired two-tailed Student's t-test.

**(K)** Immunoblotting of UCP1 protein in iBAT of male D1KO and fl/fl mice on HFD ( $n=3$ /group). \*indicates statistical significance between the two groups by unpaired two-tailed Student's t-test.

**(L)-(M)** GTT **(L)** and ITT **(M)** in male D1KO and fl/fl mice on HFD ( $n=5$ /group). \*indicates statistical significance between the two groups by unpaired two-tailed Student's t-test.

All data are expressed as mean  $\pm$  SEM.

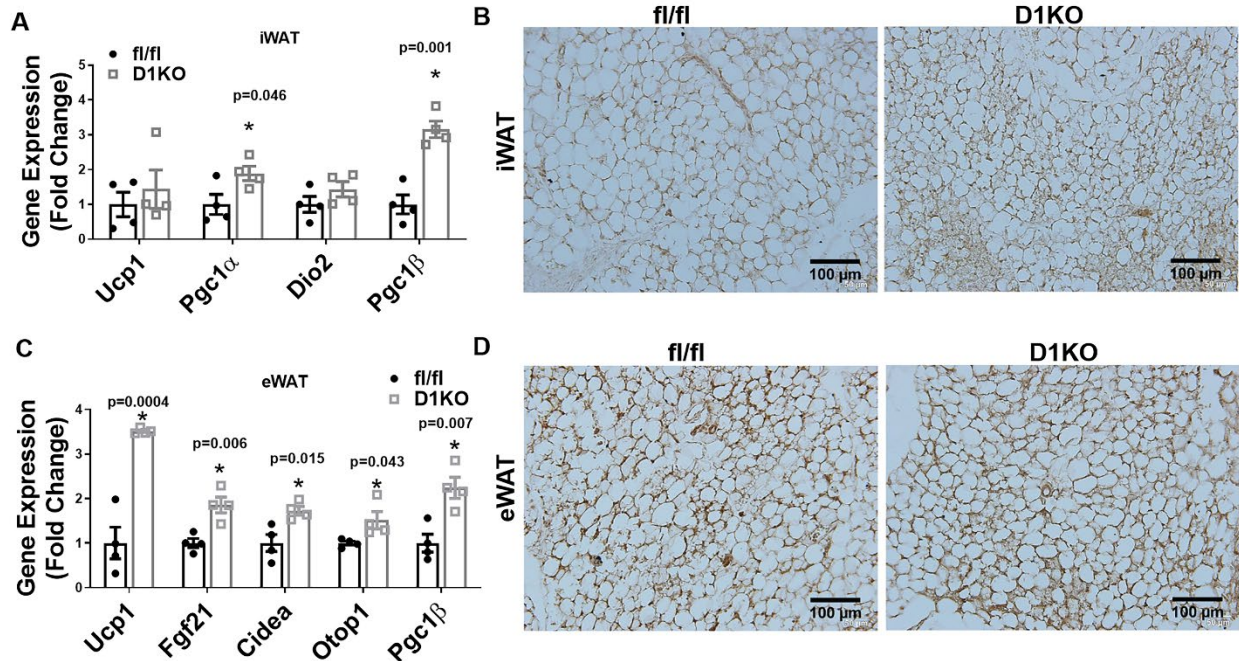

**Supplemental figure 19.** Characterization of D1KO and fl/fl during cold exposure. Two months old male D1KO and fl/fl mice were subjected to a chronic 7-day cold exposure challenge at 5°C. (A)-(B) Quantitative RT-PCR analysis of thermogenic gene expression (n=4/group) (A) and representative H&E staining (B, 3 replicates/group) in iWAT of male D1KO and fl/fl mice after chronic 7-day cold exposure.

(C)-(D) Quantitative RT-PCR analysis of thermogenic gene expression (n=4/group) (C) and representative H&E staining (D, 3 replicates/group) in eWAT of male D1KO and fl/fl mice after chronic 7-day cold exposure.

All data are expressed as mean  $\pm$  SEM. \*indicates statistical significance between the two groups by unpaired two-tailed Student's t-test.



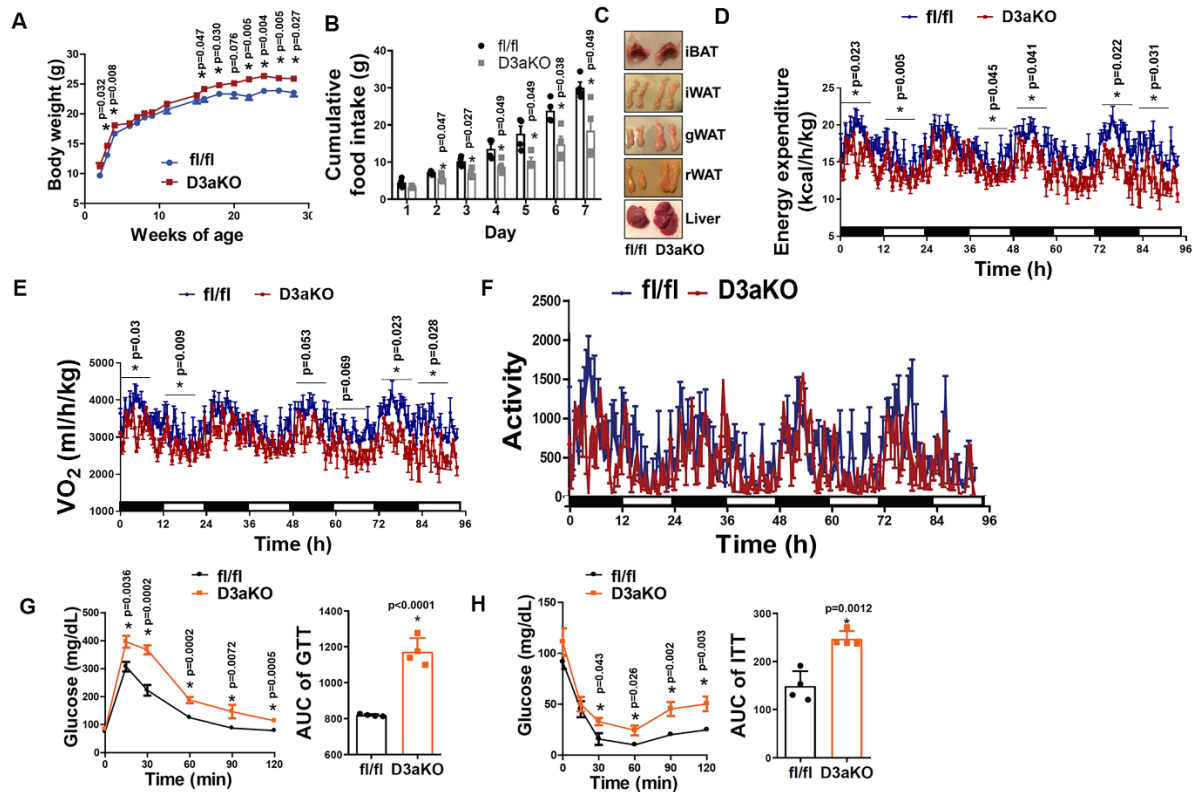

**Supplemental figure 20 (Related to Figure 6).** Metabolic characterization of D3aKO and their control fl/fl mice on chow diet.

(A)-(B) Body weight growth curve (A, n=4/group) and Food intake (B, n=4 for fl/fl and 3 for D3aKO) in D3aKO and their control fl/fl mice on chow diet. \*indicates statistical significance between the two groups by unpaired two-tailed Student's t-test.

(C) Representative fat depot and liver images in D3aKO and their control fl/fl mice on chow diet (n=4 replicates/group).

(D)-(H) Energy expenditure (D), Oxygen consumption (E), Locomotor activity (F), GTT (G), and ITT (H) in D3aKO and their control fl/fl mice on chow diet (n=4/group).

In (D), (E) and (F), \*indicates statistical significance between the two groups by one-way ANOVA with repeated measures. In (D), time 0-12 hours,  $F(1,6)=9.188$ ,  $p=0.023$ ; time 12-24 hours,  $F(1,6)=19.367$ ,  $p=0.005$ ; time 24-36 hours,  $F(1,6)=2.211$ ,  $p=0.188$ ; time 36-48 hours,  $F(1,6)=6.333$ ,  $p=0.045$ ; time 48-60 hours,  $F(1,6)=6.769$ ,  $p=0.041$ ; time 60-72 hours,  $F(1,6)=4.799$ ,  $p=0.071$ ; time 72-84 hours,  $F(1,6)=9.362$ ,  $p=0.021$ ; time 84-96 hours,  $F(1,6)=7.857$ ,  $p=0.037$ .

In (E), time 0-12 hours,  $F(1,6)=7.96$ ,  $p=0.03$ ; time 12-24 hours,  $F(1,6)=14.272$ ,  $p=0.009$ ; time 24-36 hours,  $F(1,6)=1.758$ ,  $p=0.233$ ; time 36-48 hours,  $F(1,6)=5.197$ ,  $p=0.063$ ; time 48-60 hours,  $F(1,6)=5.789$ ,  $p=0.053$ ; time 60-72 hours,  $F(1,6)=4.883$ ,  $p=0.069$ ; time 72-84 hours,  $F(1,6)=9.109$ ,  $p=0.023$ ; time 84-96 hours,  $F(1,6)=8.357$ ,  $p=0.028$ . In (G) and (H), \*indicates statistical significance between the two groups by unpaired two-tailed Student's t-test.

All data are expressed as mean  $\pm$  SEM.

**A****CpG sites at Myod1 promoter and 5'-region**

1 2 3  
 TGGCTACCCTGGGGACCCCAAGCTC**CG**CCCTACTACACTCCTATTGGCTTGAGG**CG**CCCC**CG**CCCCCAGCCTCCCTT  
 4 5 6 7 8  
 TCCAGCTCC**CG**GGCTTTTAGGCTACCTGG**ATAAATA**GCCCAGGG**CG**CCTGG**CGCGA**AGCTAGGGGCCAGGAC**CGC**  
 9 10  
 CCCAGGACAC**CG**ACTGCTTTCTTCACCACTCCTCTGACAGGACAGGACAGGGAGGAGGGGTAGAGGACAGC**CGGT**  
 11 (gRNA in blue) 12  
 GTGCATTCCAACCCACAGAACCTTTGTCATT**GTA**CTGTTGGGGTTC**CGGAGTGG**CAGAAAGTTAAGA**CG**ACTCTCA  
 13 14 15 16  
**CG**GCTTGGGTTGAGGCTGGACCCAGGAACTGGGAT**ATG**GAGCTTCTAT**CGCCG**CCACT**CG**GGACATAGACTTGA  
 17 18 19 20 21  
 CAGGCCC**CGA****CG**GCTCTCTGCTCCTTTGAGACAGCAGAC**CG**ACTTCTATGATGACCC**CGT**GTTT**CG**ACTCACCAGA  
 22 23 24 25 26  
 CCTG**CG**CTTTTTTGAGGACCTGGACC**CGCG**CCTGGTGCACATGGGAGCCCTCCTGAAAC**CG**GAGGAGCAC**CG**CACA

**B**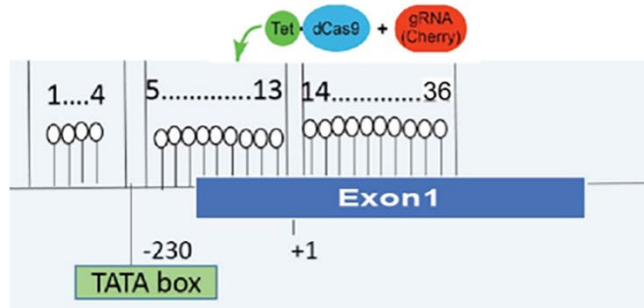

**Supplemental figure 21. (A)** CpG sites at *Myod1* promoter and 5'-region. Yellow highlights indicate CpG sites; green highlight indicates the TATAA-box; red highlight indicates translational start site (ATG); blue-highlighted region indicates the location of guide RNA (gRNA) that was used in the directed methylation targeting approach described in **(B)**.

**(B)** Schematic diagram of the strategy to specifically target demethylation at *Myod1* promoter with dCas9-TET1CD and gRNA system.



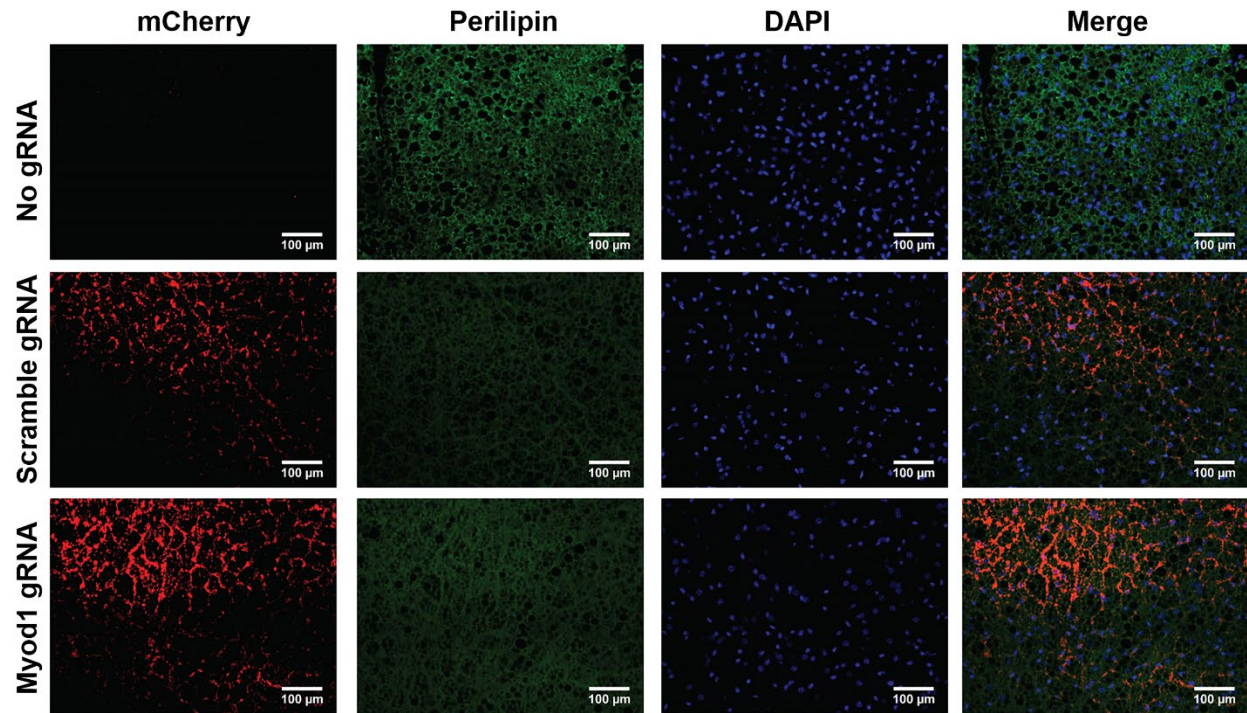

**Supplemental figure 22.** Representative images indicate IHC staining of mCherry (red), perilipin (green), DAPI (Blue) and merged images from iBAT of lentivirus-injected mice (3 replicates/group). Three-month-old chow-fed male C57BL/6J mice were bilaterally injected with lentiviruses expressing dCas9-TET1CD plus lentiviruses expressing either targeting Myod1-gRNA-mCherry or non-targeting scramble-gRNA-mCherry into iBAT. Tissues were collected 2 months after the injection.

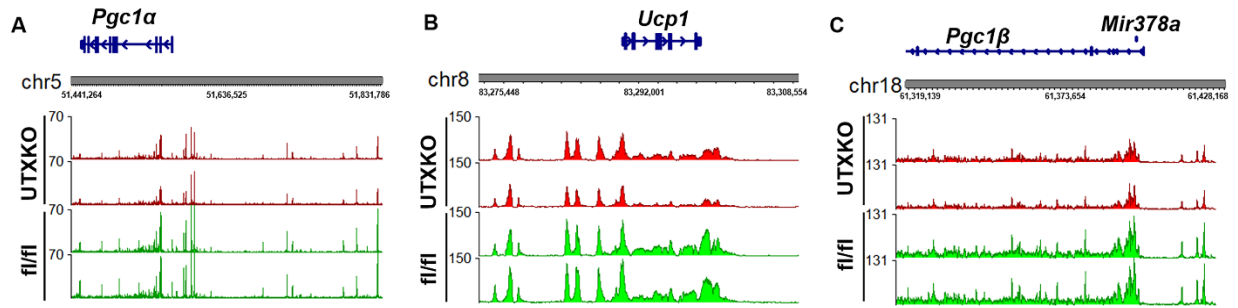

**Supplemental Figure 23.** ATAC-seq analysis of chromatin accessibility at *Pgc1α* (A), *Ucp1* (B) and *Pgc1β* (C) loci.

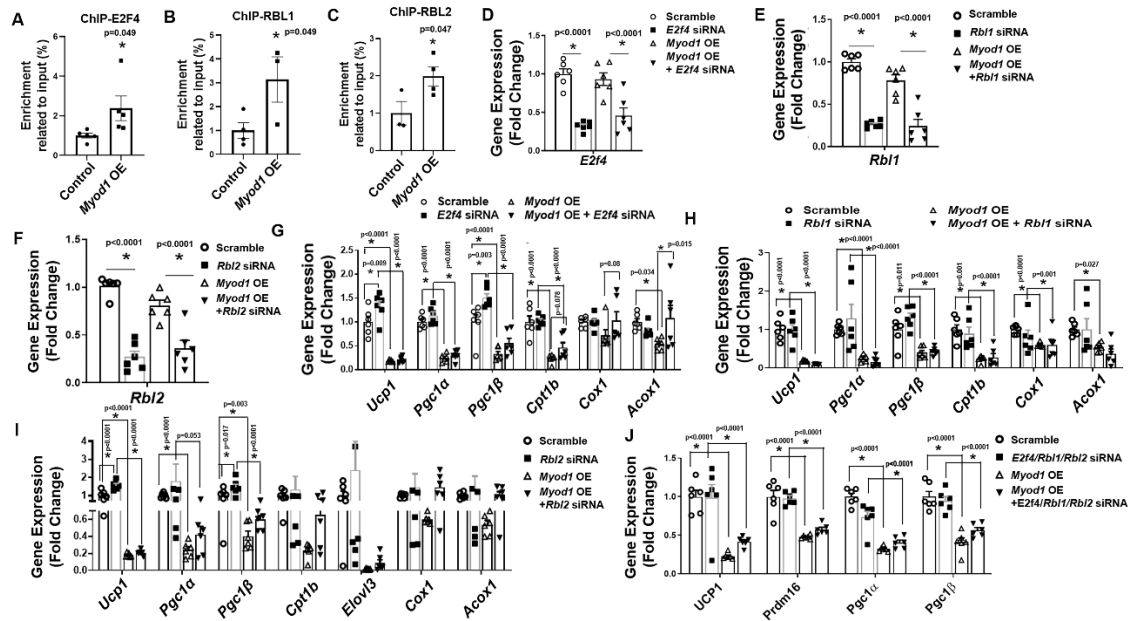

**Supplemental Figure 24.** Interaction between E2F4/RBL1/RBL2 transcription repressor complex at *Prdm16* promoter.

(A)-(C) Binding of E2F4 (A, n=5/group), RBL1 (B, n=4 for Control, and 3 for *Myod1* overexpression (OE)) and RBL2 (C, n=3 for Control and 4 for *Myod1* OE) to *Prdm16* promoter in *Myod1*-overexpressed BAT1 brown adipocytes by ChIP assay. \*indicates statistical significance by two-tailed unpaired Student's t-test.

(D)-(F) Knocking down efficiency in *Myod1*-overexpressed BAT1 brown adipocytes with simultaneous knockdown of *E2f4* (D), *Rb1* (E) and *Rb2* (F) (n=6/group). \*indicates statistical significance between groups with one-way ANOVA followed by Fisher's LSD multiple comparisons tests: F(3,20)=21.190, p<0.001 in (D), F(3,20)=46.335, p<0.001 in (E); F(3,20)=33.162, p<0.001 in (F).

(G)-(J) BAT-specific gene expression in *Myod1*-overexpressed BAT1 brown adipocytes with simultaneous knockdown of *E2f4* (G), *Rb1* (H), *Rb2* (I) and in combination (J) (n=6/group). \*indicates statistical significance among groups with one-way ANOVA followed by Fisher's LSD multiple comparisons test. In (G), F(3,20)=51.141, p<0.0001 for *Ucp1*; F(3,20)=71.342, p<0.0001 for *Pgc1α*; F(3,20)=24.74, p<0.0001 for *Pgc1β*; F(3,20)=21.315, p<0.0001 for *Cpt1b*; F(3,20)=1.522, p=0.24 for *Cox1*; F(3,20)=2.773, p=0.068 for *Acox1*.

In (H), F(3,20)=46.335, p<0.001 for *Ucp1*; F(3,20)=31.467, p<0.0001 for *Pgc1α*; F(3,20)=8.475, p=0.001 for *Pgc1β*; F(3,20)=17.768, p<0.0001 for *Cpt1b*; F(3,20)=11.637, p<0.0001 for *Cox1*; F(3,20)=2.635, p=0.078 for *Acox1*.

In (I), F(3,20)=82.253, p<0.001 for *Ucp1*; F(3,20)=2.182, p=0.122 for *Pgc1α*; F(3,20)=14.071, p<0.0001 for *Pgc1β*; F(3,20)=1.569, p=0.228 for *Cpt1b*; F(3,20)=1.964, p=0.152 for *Elovl3*; F(3,20)=1.079, p=0.381 for *Cox1*; F(3,20)=1.04, p=0.396 for *Acox1*.

In (J), F(3,20)=16.822, p<0.001 for *Ucp1*; F(3,20)=33.361, p<0.0001 for *Prdm16*; F(3,20)=44.25, p<0.0001 for *Pgc1α*; F(3,20)=26.998, p<0.0001 for *Pgc1β*.

All data are expressed as mean ± SEM.

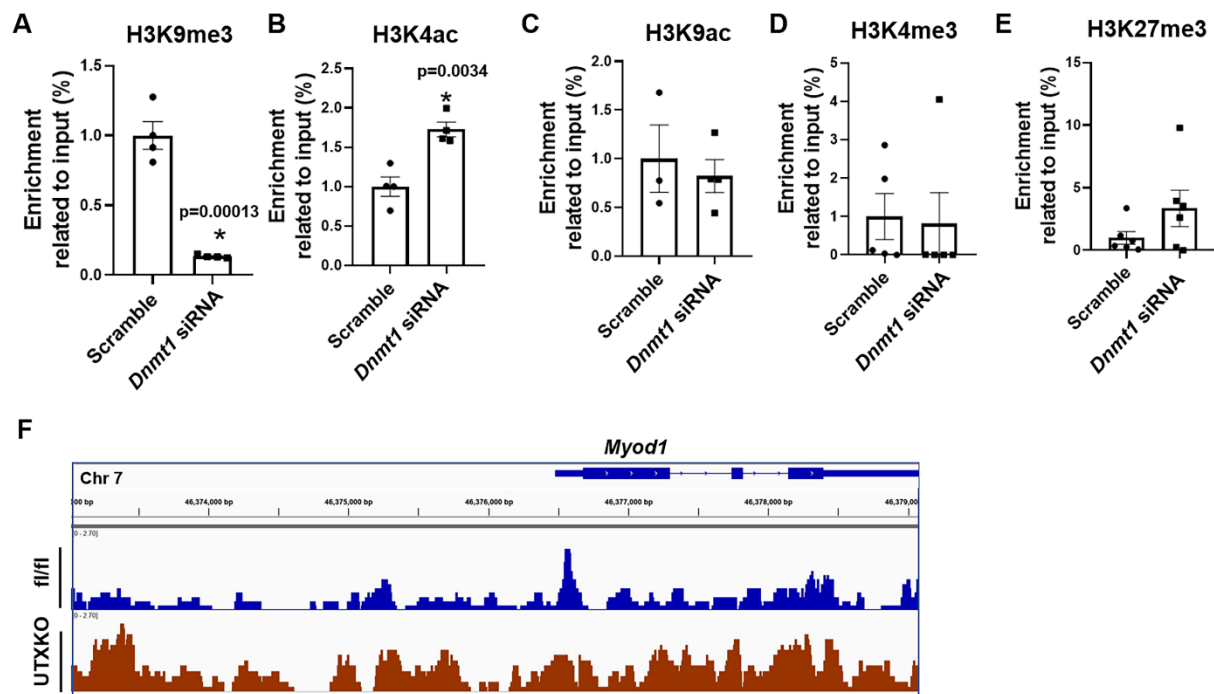

**Supplemental Figure 25.** The effect of DNMT1-mediated DNA methylation on histone modifications at *Myod1* gene locus.

(A)-(E) H3K9me3 (A, n=4/group), H3K4ac (B, n=4/group), H3K9ac (C, n=3 for Scramble and 4 for *Dnmt1* siRNA), H3K4me3 (D, n=5/group) and H3K27me3 (E, n=6/group) at *Myod1* promoter in BAT1 brown adipocytes with *Dnmt1* knock down.

(F) ATAC-seq analysis of chromatin accessibility at *Myod1* locus.

All data are expressed as mean  $\pm$  SEM. \*indicates statistical significance by two-tailed unpaired Student's t-test.

**Supplemental Table 1. Primer/probe sets for gene expression**

| <b>Gene symbol</b> | <b>Company</b> | <b>Catalog #</b> |
|--------------------|----------------|------------------|
| <i>Acox1</i>       | ABI            | Mm01246834_m1    |
| <i>Acta1</i>       | ABI            | Mm00808218_g1    |
| <i>Atp2a1</i>      | ABI            | Mm01275320_m1    |
| <i>Cd137</i>       | ABI            | Mm01268456-m1    |
| <i>Cidea</i>       | ABI            | Mm00432554_m1    |
| <i>Ckm</i>         | ABI            | Mm01321487_m1    |
| <i>Cox</i>         | ABI            | Mm04225243_g1    |
| <i>Cpt1b</i>       | ABI            | Mm00487191_g1    |
| <i>Dio2</i>        | ABI            | Mm0051664_m1     |
| <i>Dnmt1</i>       | ABI            | Mm00599783-g1    |
| <i>Ear2</i>        | ABI            | Mm04207376_gH    |
| <i>Ebf2</i>        | ABI            | Mm00438625_m1    |
| <i>Ebf3</i>        | ABI            | Mm00438642_m1    |
| <i>Elovl3</i>      | ABI            | Mm01194165_g1    |
| <i>Eva1</i>        | ABI            | Mm00468397_m1    |
| <i>Fgf21</i>       | ABI            | Mm00840165_g1    |
| <i>Klf2</i>        | ABI            | Mm00500486_g1    |
| <i>Klhl13</i>      | ABI            | Mm00470674_m1    |
| <i>Mfsd2a</i>      | ABI            | Mm01192208_m1    |
| <i>Myh1</i>        | ABI            | Mm01332489_m1    |
| <i>Myh4</i>        | ABI            | Mm01332541_m1    |
| <i>Myod1</i>       | ABI            | Mm00440387_m1    |
| <i>Myog</i>        | ABI            | Mm00446194_m1    |
| <i>Nr4a1</i>       | ABI            | Mm00440945-m1    |
| <i>Nr4a2</i>       | ABI            | Mm00443060_m1    |
| <i>Nr4a3</i>       | ABI            | Mm00450071_g1    |
| <i>Otop1</i>       | ABI            | Mm00554705_m1    |
| <i>Ppary</i>       | ABI            | Mm00440945_m1    |
| <i>Prdm16</i>      | ABI            | Mm00712556_m1    |
| <i>Sik1</i>        | ABI            | Mm00440317_m1    |
| <i>Ttn</i>         | ABI            | Mm00621005_m1    |
| <i>Utx</i>         | ABI            | Mm01283053_m1    |
| <i>E2F4</i>        | ABI            | Mm00514160_m1    |
| <i>Rbl1</i>        | ABI            | Mm01250721_m1    |
| <i>Rbl2</i>        | ABI            | Mm01242468_m1    |
| <i>Nrg4</i>        | ABI            | Mm00446254_m1    |
| <i>Atp2a2</i>      | ABI            | Mm01201431_m1    |
| <i>Pm20d1</i>      | ABI            | Mm01290668_m1    |
| <i>Myostatin</i>   | ABI            | Mm01254559_m1    |
| <i>miR-133a</i>    | ThermoFisher   | Assay ID 002246  |
| <i>miR-133b</i>    | ThermoFisher   | Assay ID 002247  |
| <i>miR-206</i>     | ThermoFisher   | Assay ID 000510  |
| <i>miR-1</i>       | ThermoFisher   | Assay ID 002222  |
| <i>U6 snRNA</i>    | ThermoFisher   | Assay ID 001973  |

**Table 2. Primer/probe sequences for gene expression**

| <b>Gene</b>                          | <b>Primer (Forward: 5'-3')</b> | <b>Primer (Reverse: 5'-3')</b> | <b>Probe (5'-3')</b>                 |
|--------------------------------------|--------------------------------|--------------------------------|--------------------------------------|
| <b>Cyclophilin<br/>(<i>Ppib</i>)</b> | GGTGGAGAGCACCAAGAC<br>AGA      | GCCGGAGTCGACAATGATG            | ATCCTTCAGTGGCTTGTCCCGGCT             |
| <b><i>Cebpβ</i></b>                  | CCAAGAAGACGGTGGACAA<br>G       | GTGCTGCGTCTCCAGGTT             | CCGCATCTTGTACTCGTCGCTCAG             |
| <b><i>Pgc1α</i></b>                  | CATTTGATGCACTGACAGA<br>TGGA    | CCGTCAGGCATGGAGGAA             | CCGTGACCACTGACAACGAGGCC              |
| <b><i>Pgc1β</i></b>                  | AGGAAGCGGCGGGAAA               | CTACAATCTCACCGAACACCTCA<br>A   | AGAGATTTCGAATGTATACCACACGGCC<br>TTCA |
| <b><i>Ucp1</i></b>                   | CACCTTCCCGCTGGACACT            | CCCTAGGACACCTTTATACCTAA<br>TGG | AGCCTGGCCTTCACCTTGGATCTGA            |

**Supplemental Table 3. Antibodies used in Immunoblotting and ChIP-qPCR**

| <b>Antibody</b>                                                                                             | <b>Company</b>               | <b>Catalog #</b>        | <b>Application</b>      |
|-------------------------------------------------------------------------------------------------------------|------------------------------|-------------------------|-------------------------|
| <b>DNMT1</b>                                                                                                | Abcam                        | Ab87654                 | WB(1:500)               |
| <b>DNMT1</b>                                                                                                | Santa Cruz<br>Biotechnology  | Sc20701 or<br>sc-271729 | ChIP(2µg/ml)            |
| <b>GFP</b>                                                                                                  | Aves labs                    | GFP-1010                | IF(1:1000)              |
| <b>UCP1</b>                                                                                                 | Abcam                        | ab23841                 | WB(1:500)               |
| <b>UCP1</b>                                                                                                 | Abcam                        | Ab10983                 | IHC(1:500)              |
| <b>KDM6A (UTX)</b>                                                                                          | Abcam                        | ab36938                 | ChIP(2µg/ml)            |
| <b>KDM6A (UTX)</b>                                                                                          | Bethyl<br>Laboratories       | A302-374A               | WB(1:500)               |
| <b>HA</b>                                                                                                   | Cell signaling<br>technology | C29F4                   | IP(2µg/ml), WB(1:1000)  |
| <b>H3K27me3</b>                                                                                             | Abcam                        | ab6002                  | ChIP(2µg/ml)            |
| <b>H3K9me3</b>                                                                                              | Abcam                        | ab8898                  | ChIP(2µg/ml)            |
| <b>H3K4me3</b>                                                                                              | Abcam                        | ab8580                  | ChIP(2µg/ml)            |
| <b>acH3K27</b>                                                                                              | Abcam                        | ab4729                  | ChIP(2µg/ml)            |
| <b>acH3K9</b>                                                                                               | Abcam                        | ab4441                  | ChIP(2µg/ml)            |
| <b>acH3K4</b>                                                                                               | Abcam                        | ab176799                | ChIP(2µg/ml)            |
| <b>mCherry</b>                                                                                              | Abcam                        | ab205402                | IF(1:1000)              |
| <b>MyHC</b>                                                                                                 | DSHB                         | MF20                    | IF(1:1000)              |
| <b>Perilipin</b>                                                                                            | Everest biotech              | EB07728                 | IF(1:1000)              |
| <b>PRDM16</b>                                                                                               | Sigma                        | SAB2900806              | WB(1:500), IP(2µg/ml)   |
| <b>PRDM16</b>                                                                                               | Sigma                        | SAB3500989              | ChIP(2µg/ml)            |
| <b>FLAG</b>                                                                                                 | Sigma                        | F3165                   | WB(1:1000),IP(2µg/ml)   |
| <b>E2F-4</b>                                                                                                | Santa Cruz<br>Biotechnology  | sc-398543               | WB(1:1000),ChIP(2µg/ml) |
| <b>p107</b>                                                                                                 | Santa Cruz<br>Biotechnology  | sc-250                  | WB(1:1000),ChIP(2µg/ml) |
| <b>p130</b>                                                                                                 | Santa Cruz<br>Biotechnology  | sc-374521               | WB(1:1000),ChIP(2µg/ml) |
| <b>α-Tubulin</b>                                                                                            | Santa Cruz<br>Biotechnology  | sc-53646                | WB(1:500)               |
| <b>Biotin-SP (long spacer)<br/>AffiniPure Donkey Anti-<br/>Rabbit IgG (H+L)</b>                             | Jackson<br>ImmunoResearch    | 711-065-152             | IHC(2µg/ml)             |
| <b>Cy™3 AffiniPure Donkey<br/>Anti-Rabbit IgG (H+L)</b>                                                     | Jackson<br>ImmunoResearch    | 711-165-152             | IF(2µg/ml)              |
| <b>Alexa Fluor® 488<br/>ffiniPure Donkey Anti-<br/>Chicken IgY (IgG) (H+L)</b>                              | Jackson<br>ImmunoResearch    | 703-545-155             | IF(2µg/ml)              |
| <b>Goat anti-Mouse IgG<br/>(H+L) Highly Cross-<br/>Adsorbed Secondary<br/>Antibody, Alexa Fluor<br/>488</b> | Invitrogen                   | A11029                  | IF(2µg/ml)              |
| <b>Goat anti-Mouse IgG<br/>(H+L) Highly Cross-<br/>Adsorbed Secondary</b>                                   | Invitrogen                   | A11032                  | IF(2µg/ml)              |

|                                                                                             |            |        |             |
|---------------------------------------------------------------------------------------------|------------|--------|-------------|
| <b>Antibody, Alexa Fluor 594</b>                                                            |            |        |             |
| <b>Goat anti-Mouse IgG (H+L) Highly Cross-Adsorbed Secondary Antibody, Alexa Fluor 680</b>  | Invitrogen | A21058 | WB(1:10000) |
| <b>Goat anti-Rabbit IgG (H+L) Highly Cross-Adsorbed Secondary Antibody, Alexa Fluor 680</b> | Invitrogen | A21109 | WB(1:10000) |



**Supplemental Table 4. Primer sequences for pyrosequencing**

| <b>Primers</b>            | <b>Sequence (5'-3')</b>        |
|---------------------------|--------------------------------|
| <i>Myod1</i> -pyroseq-F1  | TGGTTATTTTGGGGATTTTAAGTT       |
| <i>Myod1</i> -pyroseq-*R1 | TCTACCCCTCCTCCCTAT             |
| <i>Myod1</i> -pyroseq-S1  | ATTTTGGGGATTTTAAGTTT           |
| <i>Myod1</i> -pyroseq-F2  | GATAGGGAGGAGGGGTAGAGGATA       |
| <i>Myod1</i> -pyroseq-*R2 | TCCAATTCCTAAATCCAACCTCAAC      |
| <i>Myod1</i> -pyroseq-S2  | AGGGGTAGAGGATAG                |
| <i>Myod1</i> -pyroseq-F3  | GTTTGGGTTGAGGTTGGATTTA         |
| <i>Myod1</i> -pyroseq-*R3 | CTCCCATTTCAAAAAAACTCCCATATACAC |
| <i>Myod1</i> -pyroseq-S3  | GGAATTGGGATATGGAG              |
| <i>Myod1</i> -pyroseq-F4  | TGGTGTATATGGGAGTTTTTTTGAA      |
| <i>Myod1</i> -pyroseq-*R4 | AACCTCATTCACTTTACTCAA          |
| <i>Myod1</i> -pyroseq-S4  | ATGGGAGTTTTTTTGAAAT            |
| <i>Myod1</i> -pyroseq-F5  | AGTTGGGTTGGATTGTTATGT          |
| <i>Myod1</i> -pyroseq-*R5 | ACCACTACCCCTAATCCC             |
| <i>Myod1</i> -pyroseq-S5  | ATGTAGGGTTGGAGA                |
| <i>Myod1</i> -pyroseq-F6  | GGGTTAGGGATTAGGGGTAG           |
| <i>Myod1</i> -pyroseq-*R6 | CCTTACTCCAAAAATCCTCAAACCTC     |
| <i>Myod1</i> -pyroseq-S6  | GGGATTAGGGGTAGT                |

F: Forward primer; R: reverse primer; S: sequencing primer.

\*Indicates primers with biotin-tag.
